# Supplementary material for: Wood carbon fractions influence our understanding of forest carbon stocks at national scales.
Source: Research Square preprint supplement (doi:10.21203/rs.3.rs-8129687/v1), 2025-12-20
Supplement: Supplementary file 1 [file 7af8825be42b3414de5c41d6.docx]

**Supporting Information for**

Wood carbon fractions influence our understanding of forest carbon stocks at national scales.

**Authors:** Mahendra Doraisami1, Adam R. Martin1, Brian F. Walters2 and Grant M. Domke2.

1 Department of Physical and Environmental Sciences, University of Toronto Scarborough, Scarborough, ON, Canada.

2 USDA Forest Service, Northern Research Station, St. Paul, MN, USA.

*Author to whom correspondence should be addressed: [adam.martin@utoronto.ca](mailto:adam.martin@utoronto.ca)

**Figure S1.** Total forest carbon (C) stocks estimated assuming generic (50%) and species-specific wood C fractions (F), at the FIA plot (Panel a.), state (Panel b.), and Ecodivision (Panel c.) scales. Colored violins represent C stocks estimates derived from 1) a generic 50% wood CF (purple) and 2) species-specific wood CFs (yellow). Violin widths indicate the probability density of C stock observations in the dataset. **Panel a.** Total C stocks (in log-transformed Mg C) across all FIA plots (*n*=132,177 plots; *t*=- 171.74, *p* <0.001). **Panel b.** Total C stocks across states (*n*=48 states; Table S1; *t*=- 5.57, *p* <0.001). **Panel** **c.** Total C stocks across ecodivisions (*n*=19 ecodivisions; Table S2; *t*=- 1.90, *p*=0.072), on a per acre (in log-transformed Mg C). In all panels, dashed lines represent group means as follows: red lines show mean value for C stocks generated from a 50% wood CF, whereas green lines show the mean value for C stocks generated from species-specific wood CFs. Boxplots are embedded in each violin graph, with bolded center lines indicating the group’s median value.

**Table S1.** Carbon stock (C) densities, totals and changes across Forest Inventory and Analysis plots in 19 U.S. Ecodivisions. Ecodivisions are aggregated versions of ecological subregions, and are used as a unit of analysis in the Forest Inventory and Analysis program (1). Ecodivisions with the smallest (most negative) changes in carbon stocks from data-driven wood CFs appear first in the table. Mean carbon densities and stocks are derived from either data-driven wood C fractions (Doraisami et al., 2022) or a 50% wood C fraction (F). The change in carbon stocks is calculated as the difference between total C stocks derived from a data-driven wood CF vs. a 50% wood CF, and the change in C stocks is the C stock difference divided by the total C stocks derived from a 50% wood CF (+ changes represent increases in total C stocks, while – changes represent decreases in total C stocks). Standard errors (s.e.) are included for mean carbon density estimates.

| **Ecodivision** | **No. of plots** | **Mean carbon density (Mg/ha)** | **s.e. (±)** | **Mean carbon density (50% wood carbon fraction; Mg/ha)** | **s.e. (±)** | **Total carbon stocks (Mg)** | **Total carbon stocks (50% wood carbon fraction; Mg)** | **Change in carbon stocks (%)** |
| --- | --- | --- | --- | --- | --- | --- | --- | --- |
| Tropical/Subtropical  Desert Division [320] | 1836 | 6.00 | 0.26 | 6.33 | 0.27 | 4457.73 | 4704.16 | -6.33 |
| Tropical/Subtropical Steppe Division [310] | 7620 | 13.61 | 0.22 | 14.26 | 0.22 | 41958.80 | 43987.65 | -5.83 |
| Prairie Division [250] | 4943 | 51.68 | 0.82 | 54.51 | 0.87 | 103384.63 | 109044.54 | -5.15 |
| Temperate Desert Mountains [M340] | 2215 | 18.15 | 0.41 | 18.93 | 0.43 | 16266.20 | 16968.40 | -4.88 |
| Subtropical Division [230] | 30214 | 76.71 | 0.44 | 80.69 | 0.46 | 938015.39 | 986632.41 | -4.82 |
| Temperate Desert Division [340] | 3112 | 16.98 | 0.43 | 17.53 | 0.44 | 21386.19 | 22082.17 | -4.75 |
| Subtropical Mountains [M230] | 989 | 65.42 | 1.58 | 68.56 | 1.66 | 26184.19 | 27438.84 | -4.64 |
| Hot Continental Mountains [M220] | 6486 | 102.68 | 0.80 | 107.60 | 0.84 | 269513.73 | 282430.29 | -4.61 |
| Savanna Division [410] | 150 | 39.71 | 2.97 | 41.36 | 3.08 | 2410.81 | 2510.45 | -4.45 |
| Hot Continental Division [220] | 17645 | 83.55 | 0.75 | 87.22 | 0.79 | 596622.18 | 622844.28 | -4.14 |
| Tropical/Subtropical Steppe Mountains[M310] | 2061 | 25.55 | 0.71 | 25.82 | 0.70 | 21312.33 | 21532.60 | -2.91 |
| Warm Continental Division [210] | 16759 | 67.07 | 0.52 | 68.72 | 0.53 | 454888.24 | 466048.87 | -2.38 |
| Warm Continental Mountains [M210] | 3941 | 75.67 | 0.93 | 77.60 | 0.95 | 120683.31 | 123764.79 | -2.36 |
| Temperate Steppe Division [330] | 1937 | 25.84 | 0.73 | 26.40 | 0.76 | 20252.71 | 20696.42 | -1.75 |
| Mediterranean Division [260] | 618 | 142.91 | 5.13 | 142.17 | 4.95 | 35741.89 | 35555.53 | -1.52 |
| Temperate Steppe Mountains [M330] | 16107 | 49.41 | 0.38 | 49.65 | 0.38 | 322044.03 | 323669.17 | -0.69 |
| Mediterranean Mountains [M260] | 5635 | 95.09 | 1.78 | 94.32 | 1.74 | 216849.07 | 215088.75 | -0.37 |
| Marine Division [240] | 589 | 130.95 | 5.91 | 129.34 | 5.91 | 31214.38 | 30830.37 | 1.10 |
| Marine Mountains [M240] | 9308 | 137.53 | 1.60 | 135.54 | 1.56 | 518059.33 | 510551.89 | 1.21 |
